# Supplementary material for: Shelf-Life Prediction and Thermodynamic Properties of No Added Sugar Chocolate Spread Fortified with Multiple Micronutrients
Source: MDPI journal article supplement (doi:10.3390/foods11152358), 2022-08-06
Supplement: s1 [file s1]

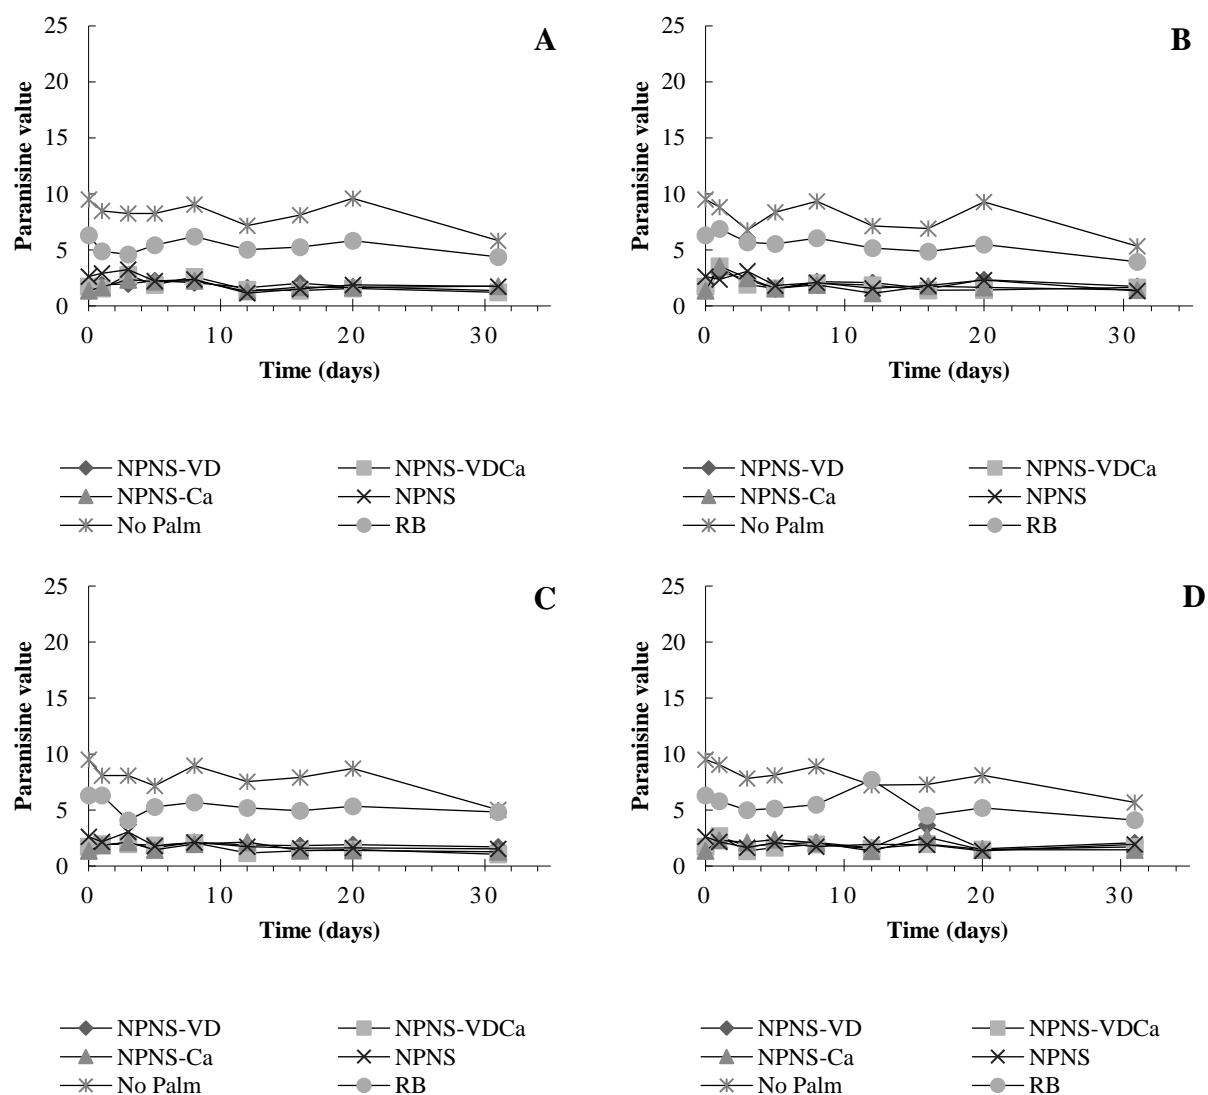

**Figure S1.** Peroxiside of the fat extracted from different chocolate spreads over 31 days of storage at 288.15 K (A), 303.15 K (B), 313.15 K (C) and 323.15 K (D).

RB Reference brand; NPNS No palm no sugar spreadable chocolate; NPNS- VD No palm no sugar chocolate spreadfortified with vitamin D; NPNS- VDCa No palm no sugar chocolate spreadfortified with vitamin D and Mg-CaCO<sub>3</sub> nanoparticles; NPNS-Ca No palm no sugar chocolate spreadfortified with Mg-CaCO<sub>3</sub> nanoparticles.

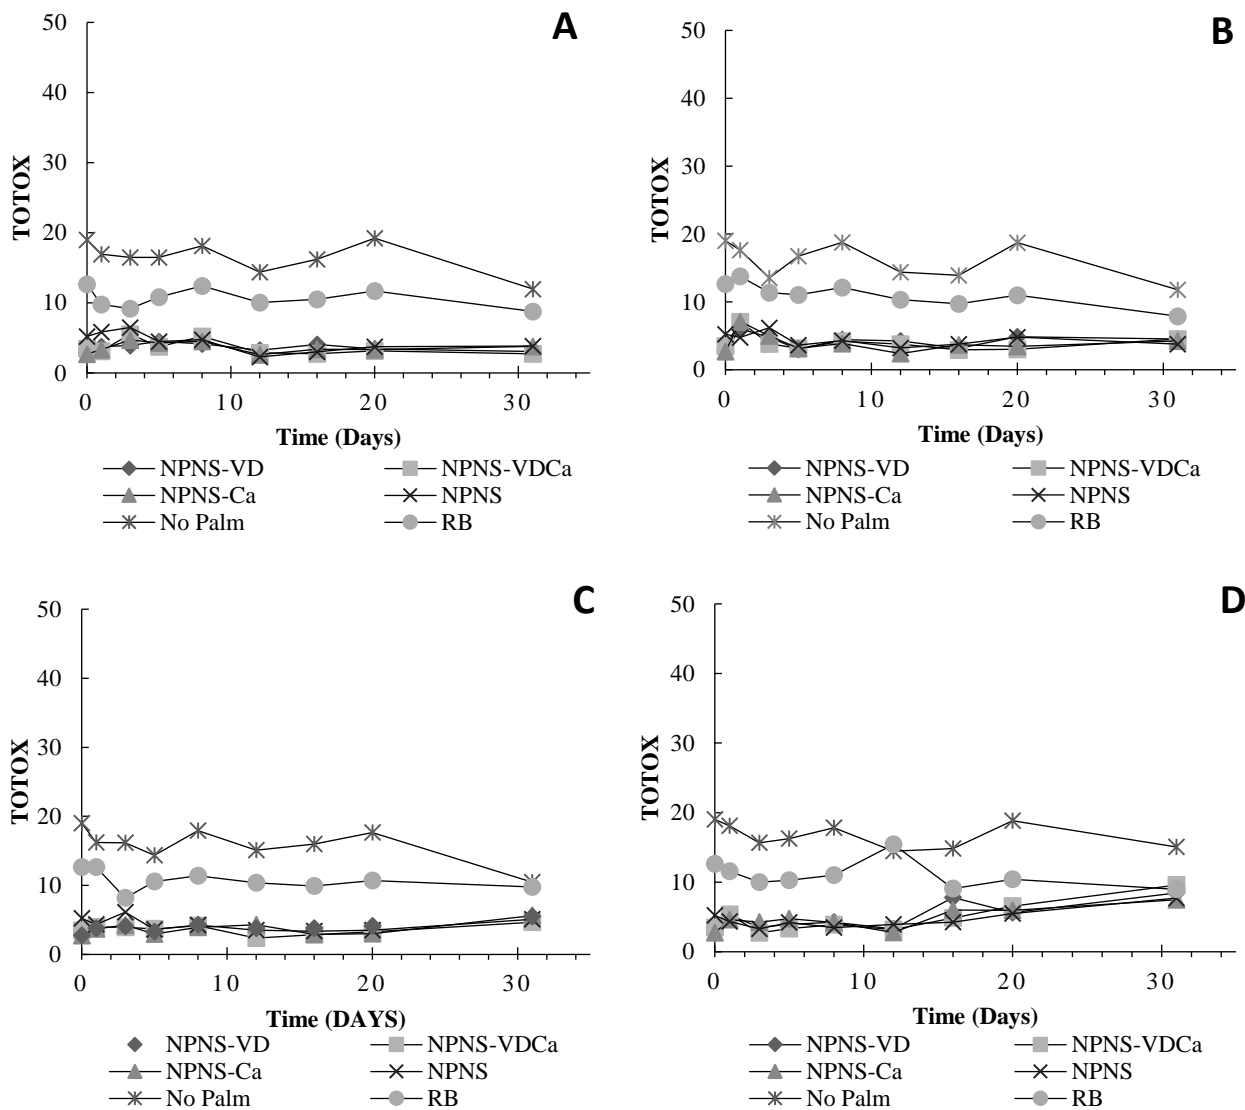

**Figure S2 .TOTOX of the fat extracted from different chocolate spreads over 31 days of storage at 288.15 K (A), 303.15 K (B), 313.15 K(C) and 323.15 K (D).**

RB Reference brand; NPNS No palm no sugar spreadable chocolate; NPNS- VD No palm no sugar chocolate spreadfortified with vitamin D; NPNS- VDCa No palm no sugar chocolate spreadfortified with vitamin D and Mg-CaCO<sub>3</sub> nanoparticles; NPNS-Ca No palm no sugar chocolate spreadfortified with Mg-CaCO<sub>3</sub> nanoparticles.
